# Supplementary material for: Capsaicin affects macrophage anti-inflammatory activity via the MAPK and NF-κB signaling pathways
Source: Atypon-hosted journal article supplement (doi:10.1024/0300-9831/a000721), 2021-07-08
Supplement: 0300-9831_a000721_esm1.pdf [file 0300-9831_a000721_esm1.pdf]

## Electronic Supplementary Material 1

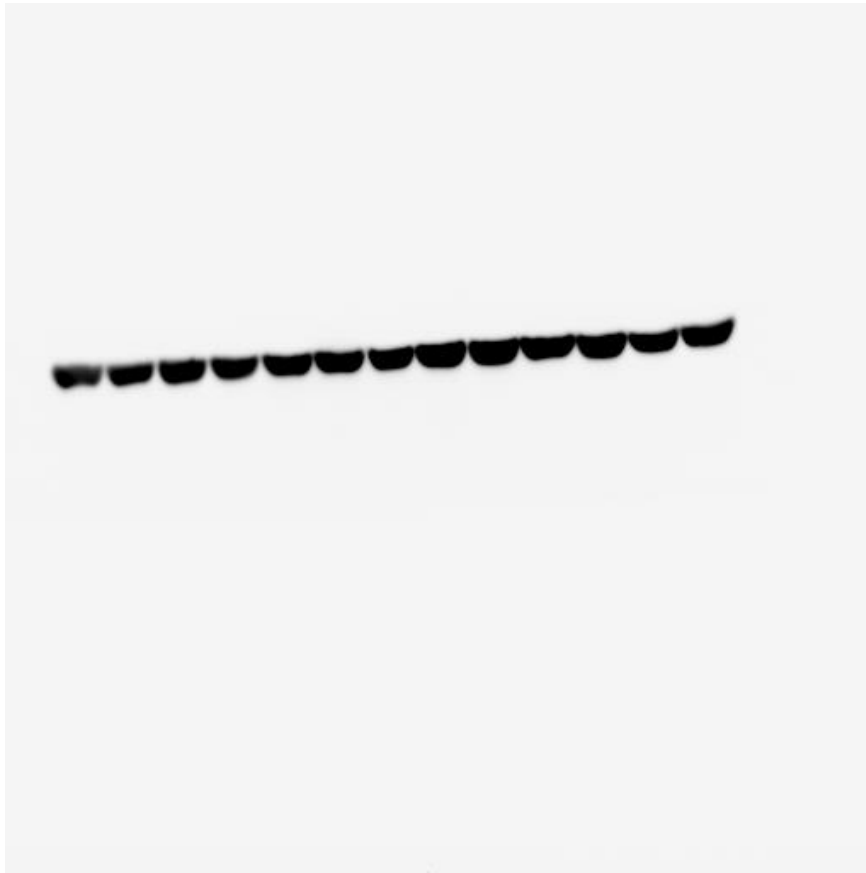

**Figure E1.** Western blot of actin-(1).

From left to right: 6. Blank; 7. LPS+ dexamethasone; 8. LPS; 9. LPS + 25  $\mu\text{g}/\text{mL}$  capsaicin; 10. LPS + 50  $\mu\text{g}/\text{mL}$  capsaicin; 11. LPS + 75  $\mu\text{g}/\text{mL}$  capsaicin; 12. LPS + 100  $\mu\text{g}/\text{mL}$  capsaicin.

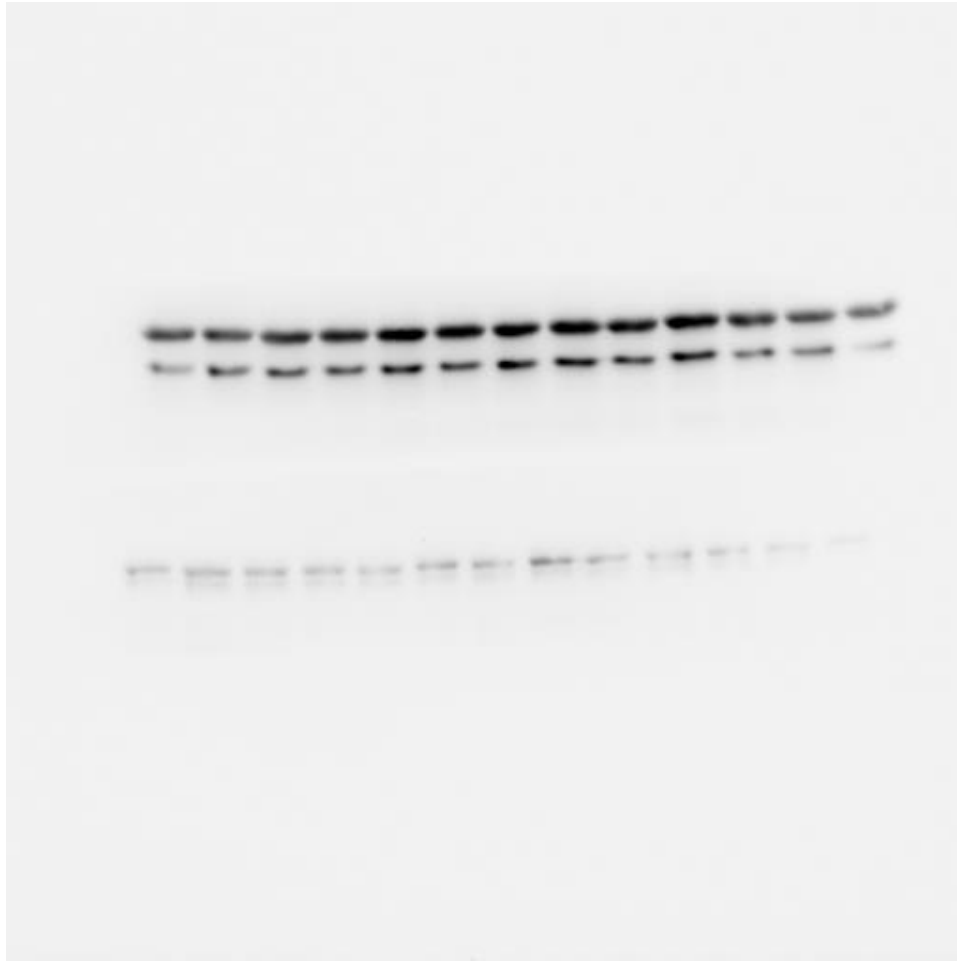

**Figure E2.** Western blot of erk3.

From left to right: 7. 8. LPS + 25  $\mu\text{g}/\text{mL}$  capsaicin; 9. LPS + 50  $\mu\text{g}/\text{mL}$  capsaicin; 10. LPS + 75  $\mu\text{g}/\text{mL}$  capsaicin; 11. LPS + 100  $\mu\text{g}/\text{mL}$  capsaicin, 12. LPS+ dexamethasone; 13. Blank.

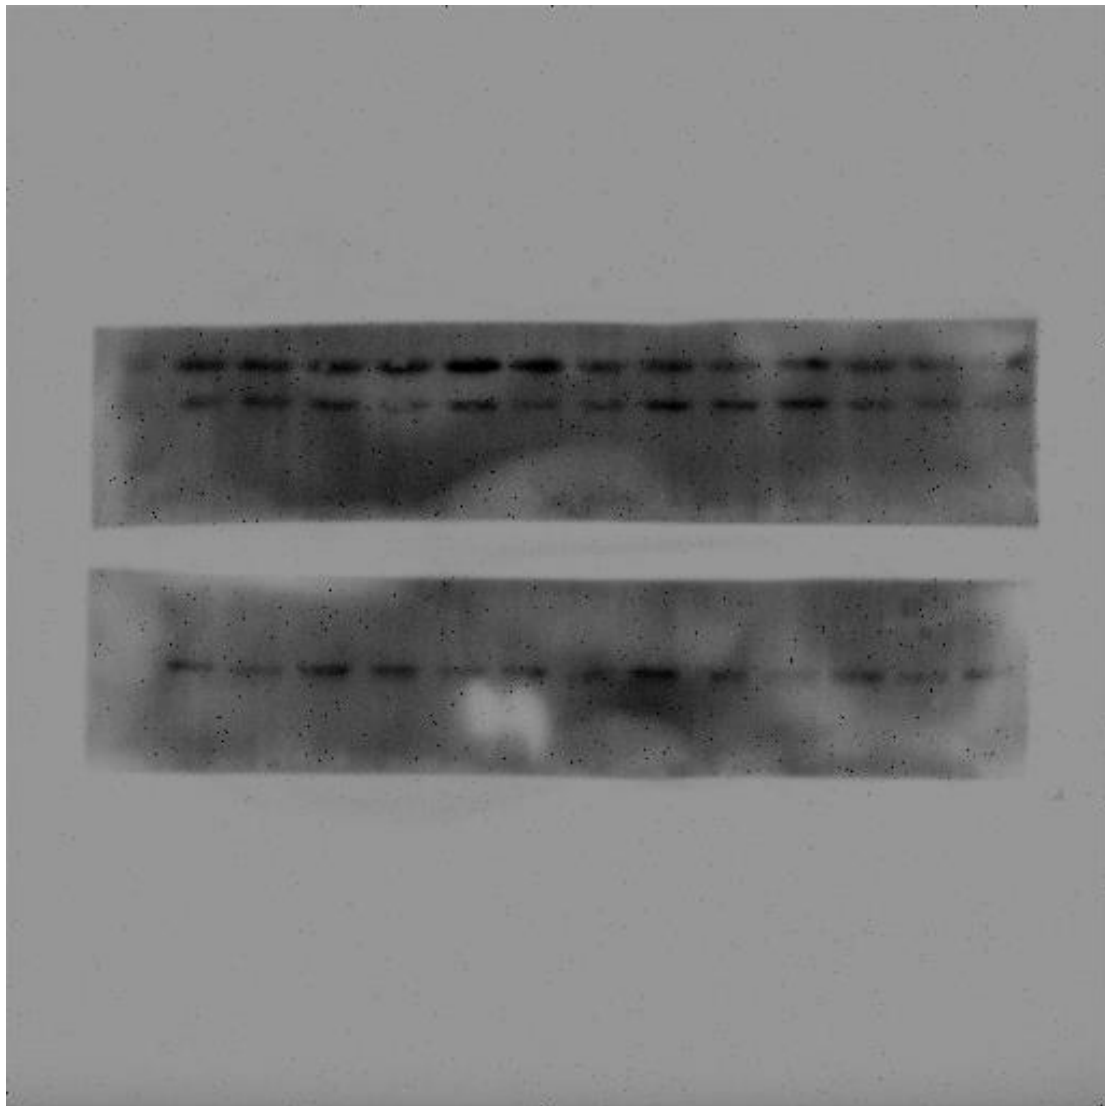

**Figure E3.** Western blot of p-Erk.

From left to right: 6. Blank; 7. LPS+ dexamethasone; 8. LPS; 9. LPS + 25  $\mu\text{g}/\text{mL}$  capsaicin; 10. LPS + 50  $\mu\text{g}/\text{mL}$  capsaicin; 11. LPS + 75  $\mu\text{g}/\text{mL}$  capsaicin; 12. LPS + 100  $\mu\text{g}/\text{mL}$  capsaicin.

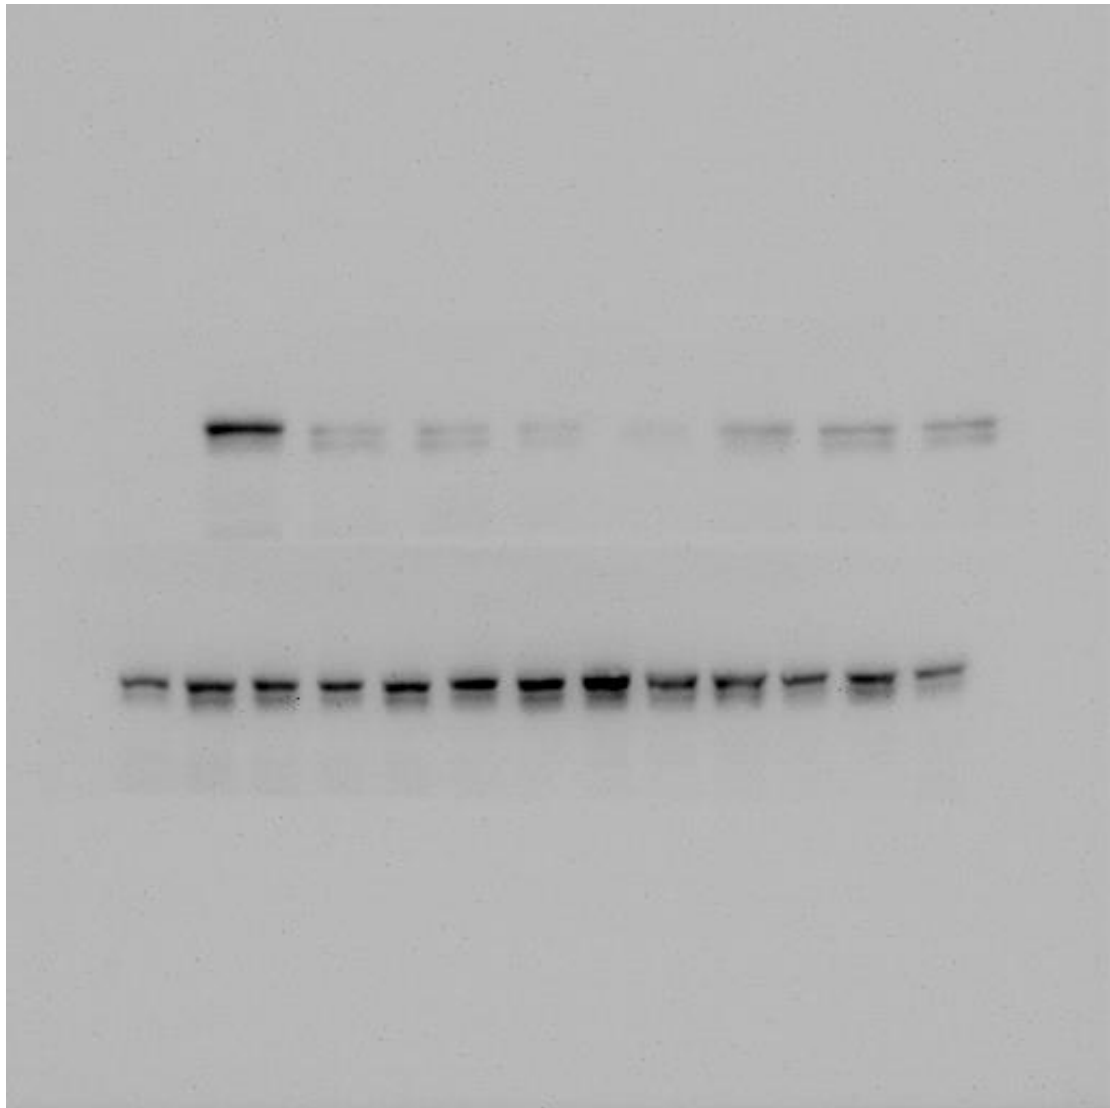

**Figure E4.** Western blot of p65-2.

From left to right: 1. 2. LPS + dexamethasone; 8. LPS; 7. LPS + 25  $\mu\text{g}/\text{mL}$  capsaicin; 6. LPS + 50  $\mu\text{g}/\text{mL}$  capsaicin; 5. LPS + 75  $\mu\text{g}/\text{mL}$  capsaicin; 4. LPS + 100  $\mu\text{g}/\text{mL}$  capsaicin.

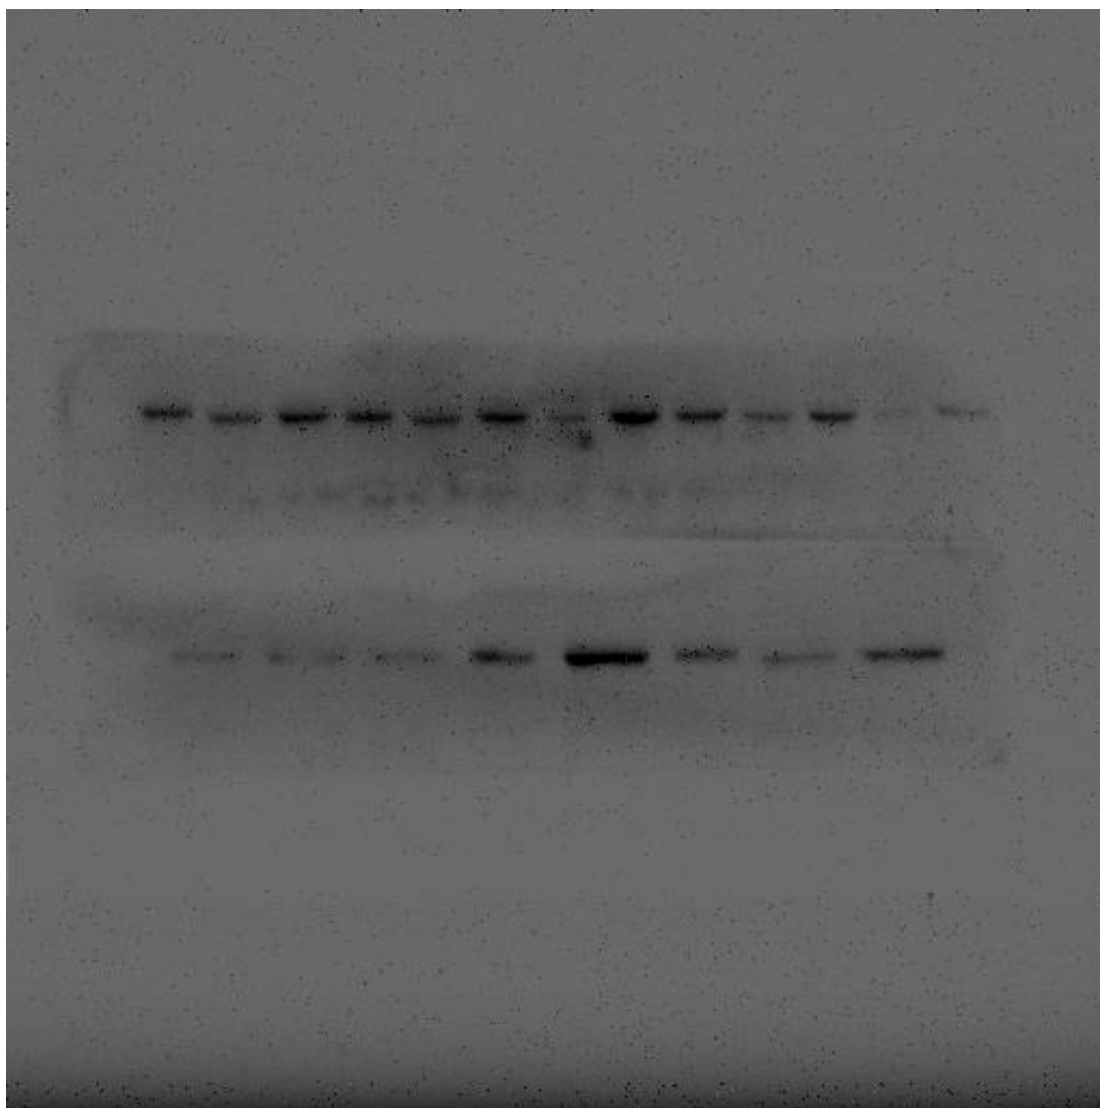

**Figure E5.** Western blot of p-p65.

From left to right: 1. 2. LPS + dexamethasone; 8. LPS; 9. LPS + 25  $\mu\text{g}/\text{mL}$  capsaicin; 11. LPS + 50  $\mu\text{g}/\text{mL}$  capsaicin; 10. LPS + 75  $\mu\text{g}/\text{mL}$  capsaicin; 13. LPS + 100  $\mu\text{g}/\text{mL}$  capsaicin.

**Table E1.** Primer sequences

| Gene                           | Primer sequence                 | Length |
|--------------------------------|---------------------------------|--------|
| <i>IL-6</i>                    | F, 5'-TGATGGATGCTACCAAACCTGG-3' | 280 bp |
|                                | R, 5'-TGGTCTTGGTCCTTAGCCACT-3'  |        |
| <i>TNF-<math>\alpha</math></i> | F, 5'-GCCAGGAGGGAGAACAGAAACT-3' | 238 bp |
|                                | R, 5'-AAGAGGCTGAGACATAGGCACC-3' |        |
| <i>iNOS</i>                    | F, 5'-ACGCTCGGAACTGTAGCACA-3'   | 276 bp |
|                                | R, 5'-GCACATCAAAGCGGCCA-3'      |        |
| <i>ACTB</i>                    | F, 5'-GAAGATCAAGATCATTGCTCCT-3' | 111 bp |
|                                | R, 5'-TACTCCTGCTTGCTGATCCA-3'   |        |

**Table E2.** Effects of capsaicin on the phagocytic function of peritoneal macrophages

| Group                     | OD value         |
|---------------------------|------------------|
| Blank group               | 0.162 ± 0.007    |
| LPS group                 | 0.203 ± 0.025&   |
| Dexamethasone group       | 0.322 ± 0.017&   |
| 25 µg/mL capsaicin group  | 0.193 ± 0.020&## |
| 50 µg/mL capsaicin group  | 0.298 ± 0.037&** |
| 75 µg/mL capsaicin group  | 0.240 ± 0.018&*# |
| 100 µg/mL capsaicin group | 0.193 ± 0.030&## |

Compared with the blank group: & indicates  $P < 0.05$ , && indicates  $P < 0.01$ . A

comparison between the capsaicin and LPS groups: \*\* indicates  $P < 0.01$ . A

comparison between the capsaicin and dexamethasone groups: # indicates  $P < 0.05$ ;

## indicates  $P < 0.01$ .

### **Description of images of western blots**

In the article "Effects of capsaicin on macrophage anti-inflammatory activity via MAPK and NF- $\kappa$ B signaling pathways," Figure E3 shows the effects of capsaicin on the expression levels of ERK and p-erk proteins in LPS-induced peritoneal macrophages. Figure E4 shows the effect of capsaicin on expression levels of p65 and p-p65 proteins in LPS-induced peritoneal macrophages. To make the arrangement order of each group in figure E4 and figure E5 in this paper consistent, the original figure was clipped and shifted.
